# Supplementary material for: A (001) dominated conjugated polymer with high-performance of hydrogen evolution under solar light irradiation
Source: Royal Society of Chemistry journal article supplement (doi:10.1039/c7cc06105f), 2017-01-01
Supplement: c7cc06105f1.pdf [file c7cc06105f1.pdf]

## Supporting Information

### A (001) Dominated Conjugated Polymer with High-performance of Hydrogen Evolution under Solar Light Irradiation

*Jun Zhou, Yanhua Lei, Chenghai Ma, Wenhua Lv, Na Li, Ying Wang\*, Hu Xu\*, and Zhigang Zou\**

#### *Synthesis of PI-SM*

PI-SM was synthesized in an autoclave with Teflon lining. As typically shown in scheme S1: 3.27g (3.0eq, 15mmol) pyromellitic dianhydride (PMDA) was firstly dissolved into a mixture of N, N-Dimethylformamide (DMF) and ethanediol (10 mL with a ratio v/v of 1:1) under stirring, and then 1.26 g (2.0eq, 10 mmol) melamine (MA) was slowly added into the transparent solution. This solution had been stirring until gel-like precursor formed, and afterward the mixture was heated at 180 Celsius degree for 3 days in preheated oven. The resultant precipitate was collected by filtration followed by washed with acetone and water (at 90 Celsius degree), and finally the product was dried at 100 °C under vacuum.

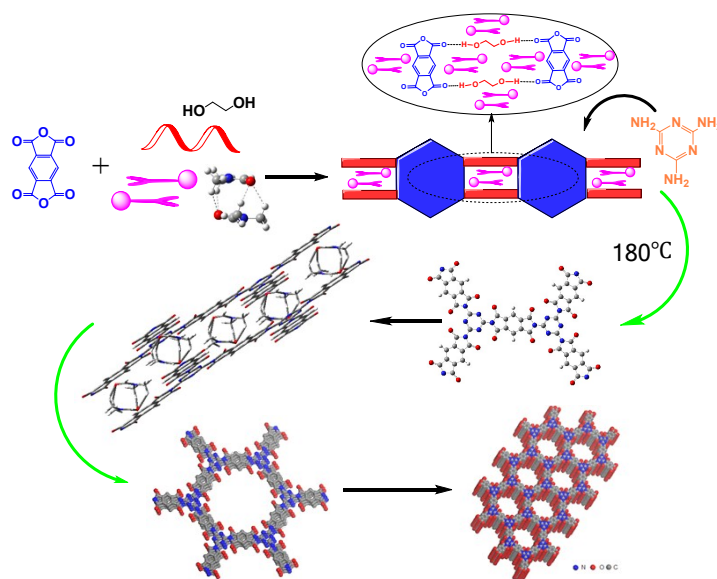

Scheme S1. Proposed synthesis mechanism for (001) dominated PI-SM.

### *Synthesis of PI-TC and g-C<sub>3</sub>N<sub>4</sub>*

PI-TC sample was synthesized by direct thermal polymerization of PMDA and MA at 325 Celsius degree for 4h according to literature <sup>[S1]</sup> for comparison, while g-C<sub>3</sub>N<sub>4</sub> was prepared by heating dicyandiamide at 823K for 4h as previously reported. <sup>[S2]</sup>

### *Characterization:*

FTIR spectra of samples were recorded on a Nicolet NEXUS870 spectrometer. XRD tests were performed on a Bruker D8 Advance X-ray diffractometer equipped with a  $\theta/2\theta$  Bragg–Brentano geometry and nickel-filtered Cu K $\alpha$  radiation ( $K\alpha_1 = 1.5406 \text{ \AA}$ ,  $K\alpha_2 = 1.5444 \text{ \AA}$ ,  $K\alpha_1/K\alpha_2 = 0.5$ ), with the tube voltage and current were 40 kV and 40 mA, respectively. Electron paramagnetic resonance (EPR) measurements were carried out on a Bruker EMX-10/12 instrument with equal amount samples (50 mg). The transmission electron microscopy (TEM) image was recorded on a JEM-2100 electron microscope operating at 200 kV. SEM images were acquired on a Hitachi S4800 FE-SEM microscope at 20 kV, 10  $\mu$ A. The UV-Vis spectra of samples were collected with Shimadzu UV-2550 spectrometer. Photoluminescence spectra were recorded on a Varian Cary Eclipse spectrophotometer. Small-angle X-ray scattering (SAXS) experiments were performed at beamline BL19U2 of the National Center for ProteinScience Shanghai (NCPSS) at Shanghai Synchrotron Radiation Facility (SSRF).

### *Photocatalytic tests:*

Photocatalytic reactions were carried out in a closed gas-circulation system, for which a 300W Xenon lamp was used as the light source, and 50 mg catalyst was dispersed in an aqueous solution (400 mL) containing methanol (10 vol%) as the sacrificial electron donor and 3 wt% Pt as the cocatalyst. Pt was photo-deposited on the catalyst by using H<sub>2</sub>PtCl<sub>6</sub> dissolved in the reactant solution, and the evolved H<sub>2</sub> was analyzed by an online gas chromatography (GC-2014, Shimadzu, TCD, Argon carrier) during the reaction. For long-time hydrogen evolution test with three runs of cycle, the amount of catalyst was increased to 200 mg while the Pt loading were 1 wt% and 3wt% respectively. The quantum efficiency was measured generally using the

equation:  $\Phi (\%) = (2 \times H/I) \times 100$ , where H and I represent the numbers of evolved H<sub>2</sub> molecules and incident photons, respectively. The number of incident photons was measured to be  $1.5 \times 10^{21}$  photons·h<sup>-1</sup> at  $365 \pm 10$  nm using Newport handheld power meters.

## References

- [S1] S. Chu, Y. Wang, Y. Guo, P. Zhou, H. Yu, L. L. Luo, F. Kong, Z. G. Zou, *J. Mater. Chem.* **2012**, 22, 15519.
- [S2] X. Wang, K. Maeda, A. Thomas, K. Takanabe, G. Xin, J. M. Carlsson, K. Domen, M. Antonietti, *Nat. Mater.* **2009**, 8, 76.

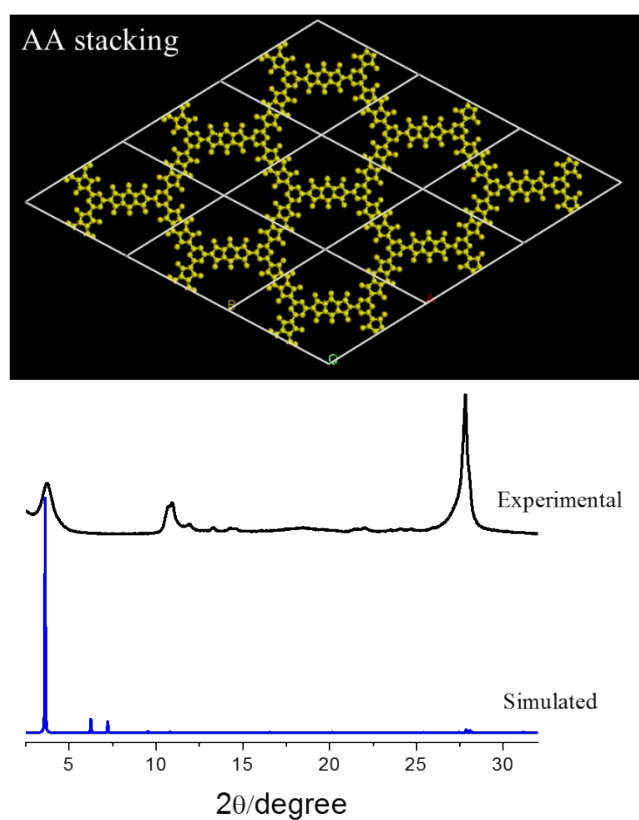

**Figure S1.** Simulated PXRD pattern of PI-COF with AA stacking

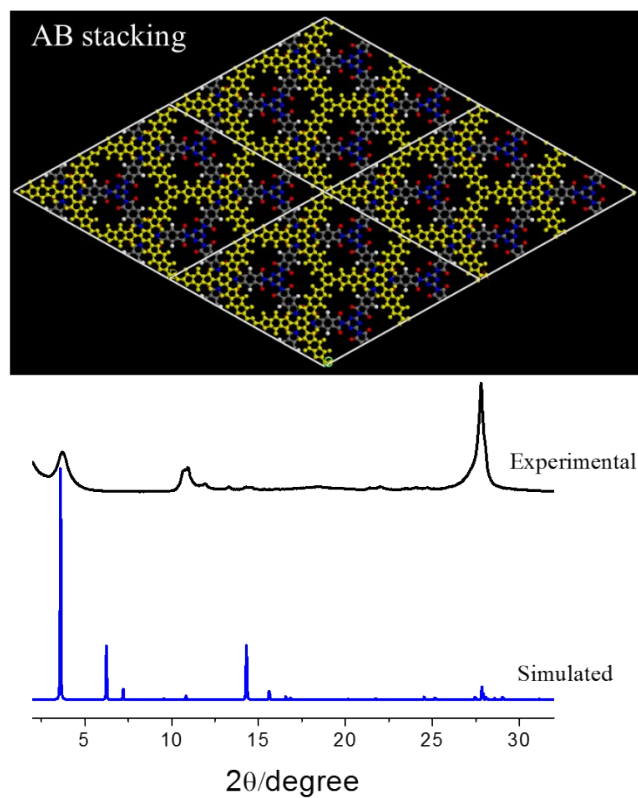

**Figure S2.** Simulated PXRD pattern of PI-COF with AB stacking

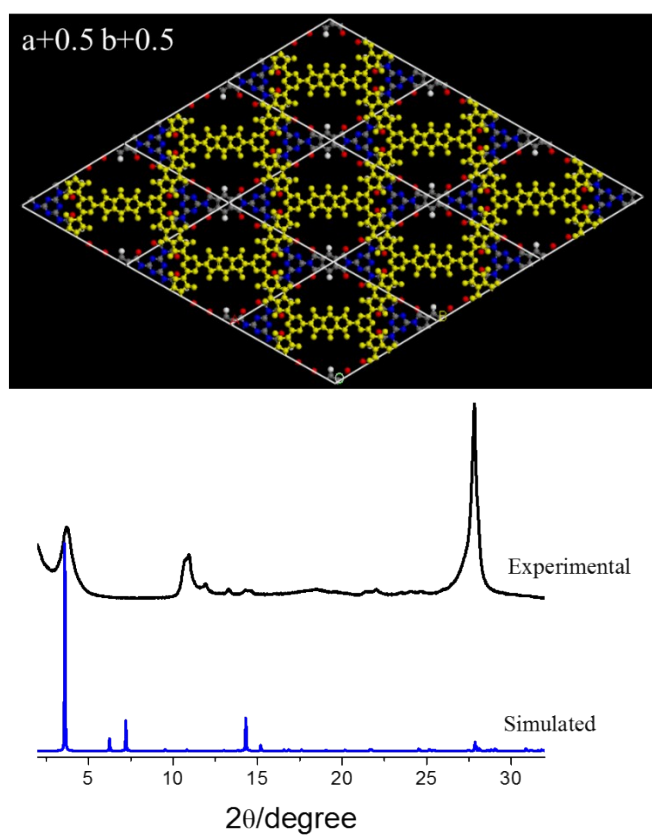

**Figure S3.** Simulated PXRD pattern of PI-COF with slipped distance of 1/2 unit cell along a and b axis

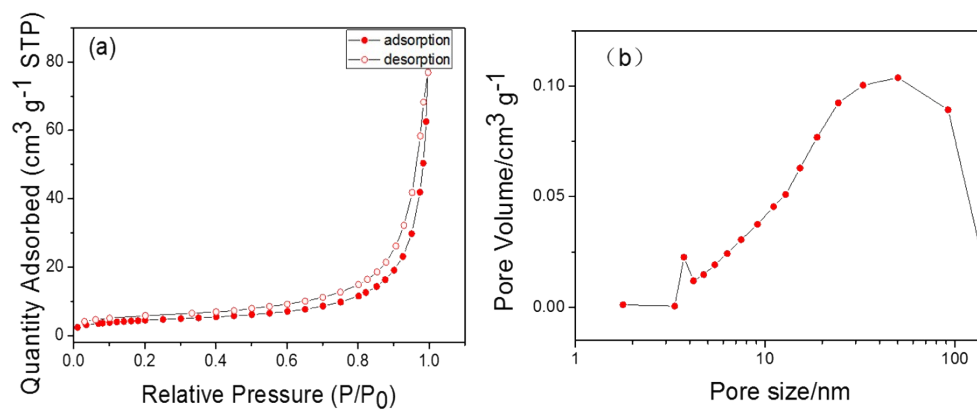

**Figure S4.**  $N_2$  adsorption isotherm (a) and Pore size distribution (b) of PI-COF

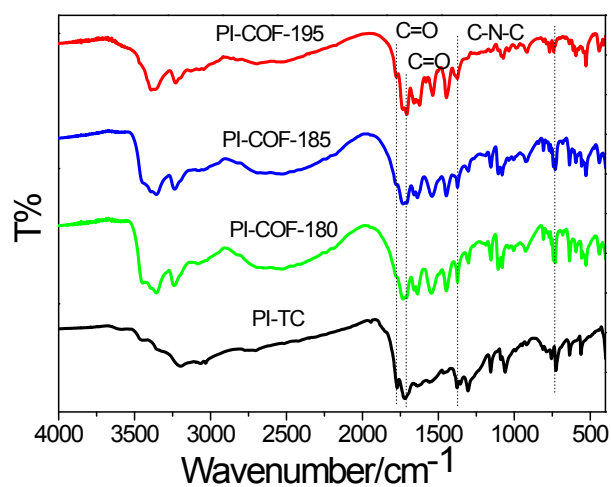

**Figure S5.** FTIR spectrum of PI-COF and PI-TC.
